# Supplementary material for: Metabolomic Biomarkers in Urine of Cushing’s Syndrome Patients
Source: PubMed Central journal article supplement (PMC5343830; doi:10.3390/ijms18020294), 2017-01-29
Supplement: ijms-18-00294-s001.pdf [file ijms-18-00294-s001.pdf]

## Supplementary Materials: Metabolomic Biomarkers in Urine of Cushing's Syndrome Patients

Alicja Kotłowska, Tomasz Puzyn, Krzysztof Sworczak, Piotr Stepnowski and Piotr Szefer

**Table S1.** Metadata obtained for patients. All the results apart from gender are expressed as medians (5th, 95th percentile).

| <b>Metadata</b>                                                 | <b>Adrenal Incidentaloma (n = 25)</b> | <b>Cushing's Syndrome (n = 16)</b> |
|-----------------------------------------------------------------|---------------------------------------|------------------------------------|
| Age (years)                                                     | 49 (43, 57)                           | 51 (44, 58)                        |
| Gender (%)                                                      | 72% females<br>28% males              | 68.75% females<br>31.25% males     |
| Height (cm)                                                     | 163 (157, 176)                        | 167.5 (158, 178)                   |
| Weight (kg)                                                     | 77 (71, 89)                           | 86 (74.5, 101)                     |
| BMI (kg/m <sup>2</sup> )                                        | 28.9 (27.9, 30.3)                     | 30.8 (29.9, 33)                    |
| UFC (nmol/24 h) <sup>1</sup>                                    | 112 (86, 144)                         | 905 (690, 1409)                    |
| Serum cortisol after DXM suppression test (nmol/L) <sup>2</sup> | 66 (36, 85)                           | 279 (170, 367)                     |

<sup>1</sup> UFC normal range: 12–330 nmol/24 h, values > 330 nmol/24 h indicated hypercortisolism; <sup>2</sup> Serum cortisol after dexamethasone (DXM) suppression test: concentrations < 50 nmol/L excluded hypercortisolism, intermediate cut-off point of 94 nmol/L indicated subclinical hypercortisolism, >140 nmol/L indicated hypercortisolism.
